# Supplementary figures and images for: The Hippo effector Yorkie activates transcription by interacting with a histone methyltransferase complex through Ncoa6
Source: eLife journal article supplement (doi:10.7554/elife.02564), 2014-07-15

# Figure 1-figure supplement

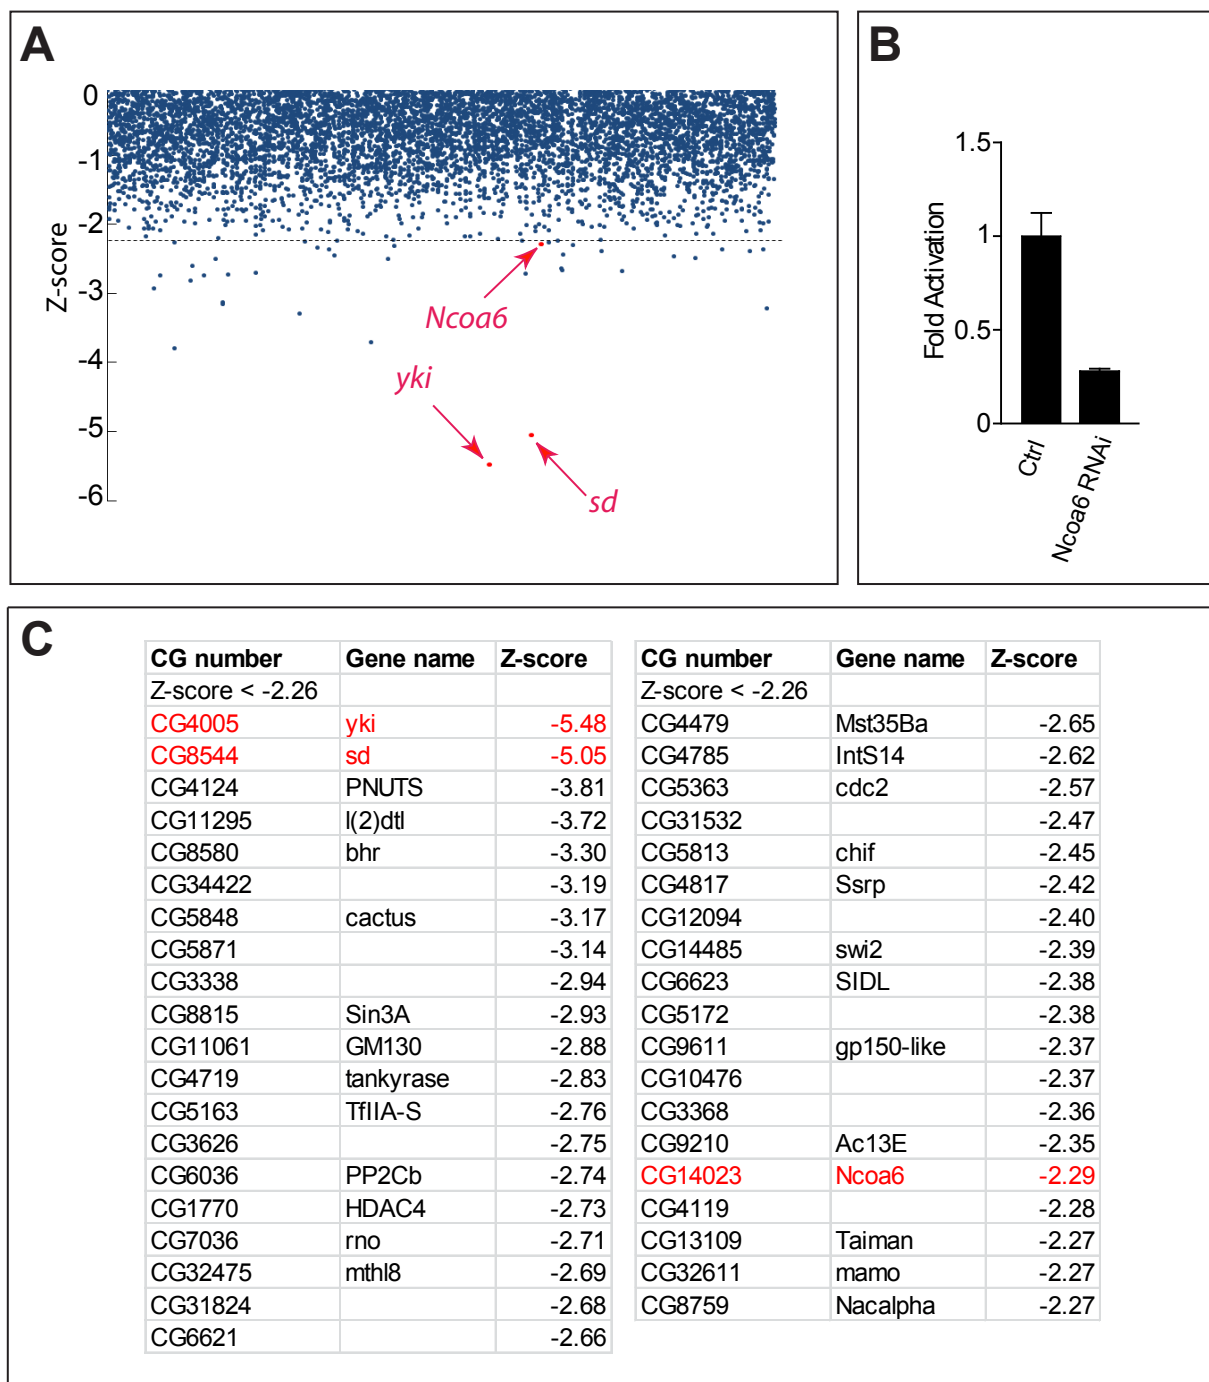

Supplement: supp [file elife-02564-supp-v1.zip]

Figure 6-figure supplement

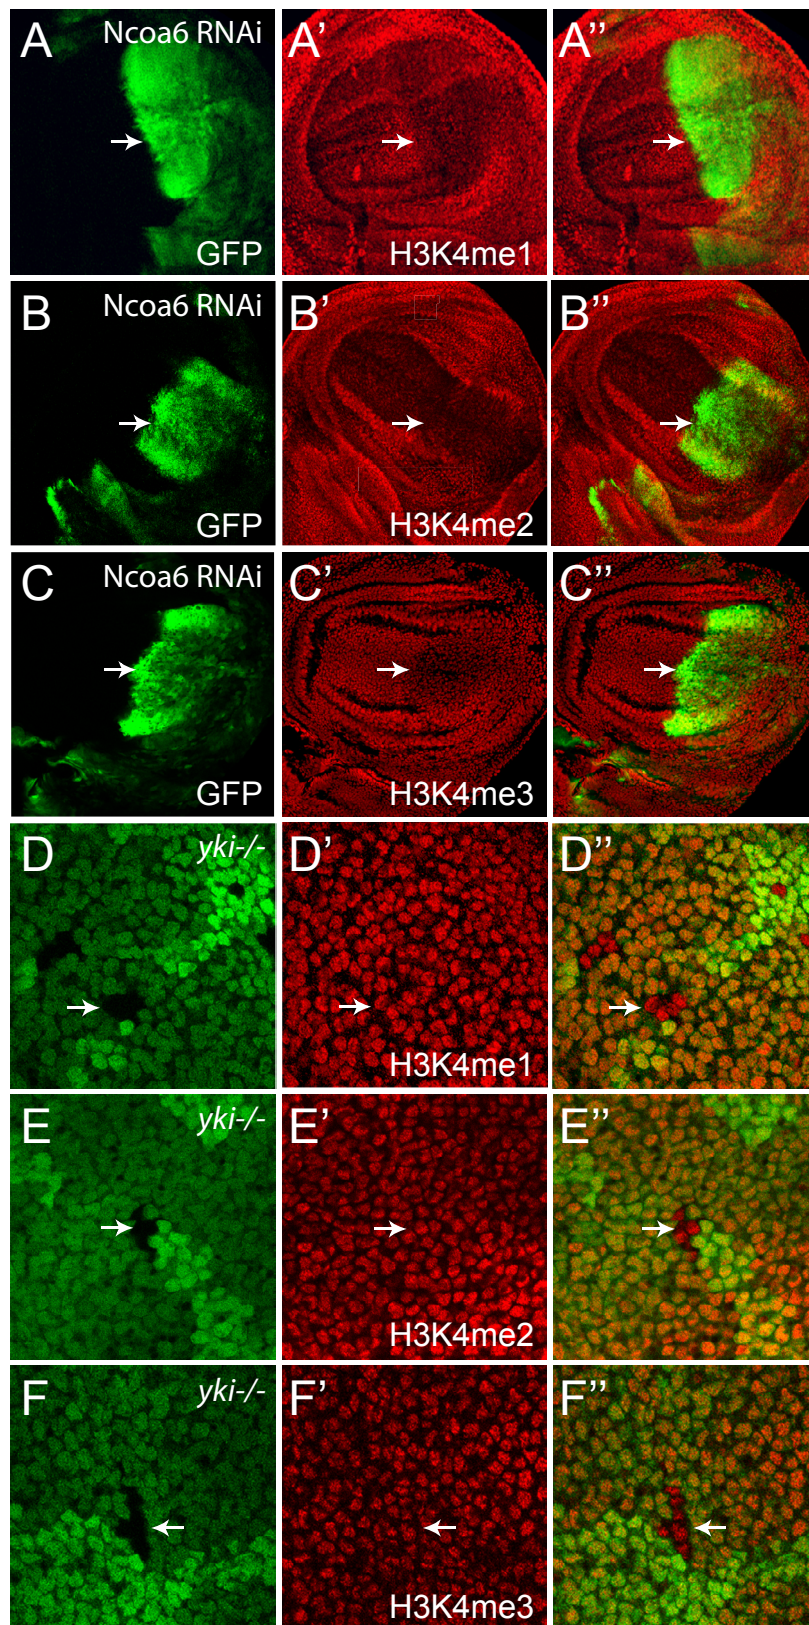

Supplement: supp [file elife-02564-supp-v1.zip]
